# Supplementary material for: BiMnPO5 with ferromagnetic Mn2+–(μ-O)2–Mn2+ units: a model for magnetic exchange in edge-linked Mn2+O6 octahedra
Source: Royal Society of Chemistry journal article supplement (doi:10.1039/d1cc02595c), 2021-01-01
Supplement: d1cc02595c1.pdf [file d1cc02595c1.pdf]

## Supplementary Information for:

### **BiMnPO<sub>5</sub> with ferromagnetic Mn<sup>2+</sup>-(μ-O)<sub>2</sub>-Mn<sup>2+</sup> units: a model for magnetic exchange in edge-linked Mn<sup>2+</sup>O<sub>6</sub> octahedra.**

*Rukang Li,<sup>a,b</sup> Ronald I. Smith<sup>c</sup> and Colin Greaves<sup>d</sup>*

<sup>a</sup>*Beijing Centre for Crystal Research and Development, Key Laboratory of Functional Crystals and Laser Technology, Technical Institute of Physics and Chemistry, Chinese Academy of Sciences. Beijing 100190, China*

<sup>b</sup>*Center of Materials Science and Optoelectronics Engineering, University of Chinese Academy of Sciences. Beijing 100049, China.*

<sup>c</sup>*ISIS facility, RAL, Chilton, Didcot, Oxon OX11 0QX, United Kingdom*

<sup>d</sup>*School of Chemistry, University of Birmingham, Birmingham B15 2TT, UK*

## Contents

### **1. Synthesis and methods**

Full details relating to sample synthesis, the collection of neutron diffraction data and computational methods.

### **2. Figures**

Additional figures containing profiles from neutron powder diffraction, the magnetic structure and details of the possible magnetic exchange pathways. Reference to all the figures is found in the main text.

### **3. References**

References relating to synthesis and methods.

## 1. Synthesis and Methods

Samples of  $\text{BiMnPO}_5$  were prepared by carefully heating a stoichiometric mixture of  $\text{MnO}$  (previously obtained by reducing  $\text{MnO}_2$  in a flowing mixture of 10%  $\text{H}_2$  / 90%  $\text{N}_2$  at 800 °C for 48 hours),  $\text{NH}_4\text{H}_2\text{PO}_4$  and  $\text{Bi}_2\text{O}_3$  from 300°C to 800°C in air.<sup>1</sup> Since heating above 820°C resulted in decomposition, the target phase was obtained using a final heating at 800°C for a week with intermittent grinding. The phase purity at each stage was monitored with a Siemens D5000 X-ray diffractometer in transmission mode with monochromatic  $\text{CuK}\alpha_1$  radiation and a position sensitive detector. Time-of-flight NPD data were collected from a 2-3 g sample in a vanadium tube at the instrument POLARIS (earlier design than the current instrument) at ISIS, RAL, Oxford, UK.<sup>2</sup> Data were obtained at ambient temperature and 1.8 K, achieved in an AS Scientific "Orange" cryostat with continuous pumping. Rietveld structure refinements on the collected XRD and NPD patterns were carried out using GSAS<sup>3</sup> with the EXPGUI interface.<sup>4</sup> The magnetic order was initially determined using the nuclear unit cell (space group  $P2_1/n$ ), appropriately enlarged to allow for the additional magnetic reflections. Subsequently, this was converted to the standard setting of  $P2_1/c$  for the magnetic cell (giving the magnetic space group  $P_a2_1/c$ ) but  $P2_1/n$  was retained for the nuclear structure to allow direct comparison with literature reports. No individual magnetic reflections were apparent for  $\text{Mn}_3\text{P}_2\text{O}_8$  in the range from 4-12Å (see Fig. 2a in the main text and Fig. S1). Any magnetic contribution at lower  $d$  values would be insignificant so the magnetic contribution was ignored.

*Ab initio* calculations on a model of  $\text{Mn}_2\text{O}_2(\text{H}_2\text{O})_8$  with experimental geometry and variable Mn–Mn distances were performed using the CRYSTAL17 code;<sup>5</sup> a recently developed triple-zeta variable polarization (TZVP) basis set was applied to all the atoms in the molecule.<sup>6</sup> The calculation was done on a DFT level with a hybrid functional ( $\alpha = 0.10$ ) of B3LYP parameterization.<sup>7,8</sup> The total energies of the model with FM and AFM coupling of the two Mn(II) ions were obtained and the Heisenberg exchange parameters ( $J$ ) were deduced with the expression proposed by Yamaguchi *et al.*:<sup>9</sup>

$$J = \frac{E^{LS} - E^{HS}}{\langle S^2 \rangle^{HS} - \langle S^2 \rangle^{LS}} \quad (1)$$



## 2. Figures

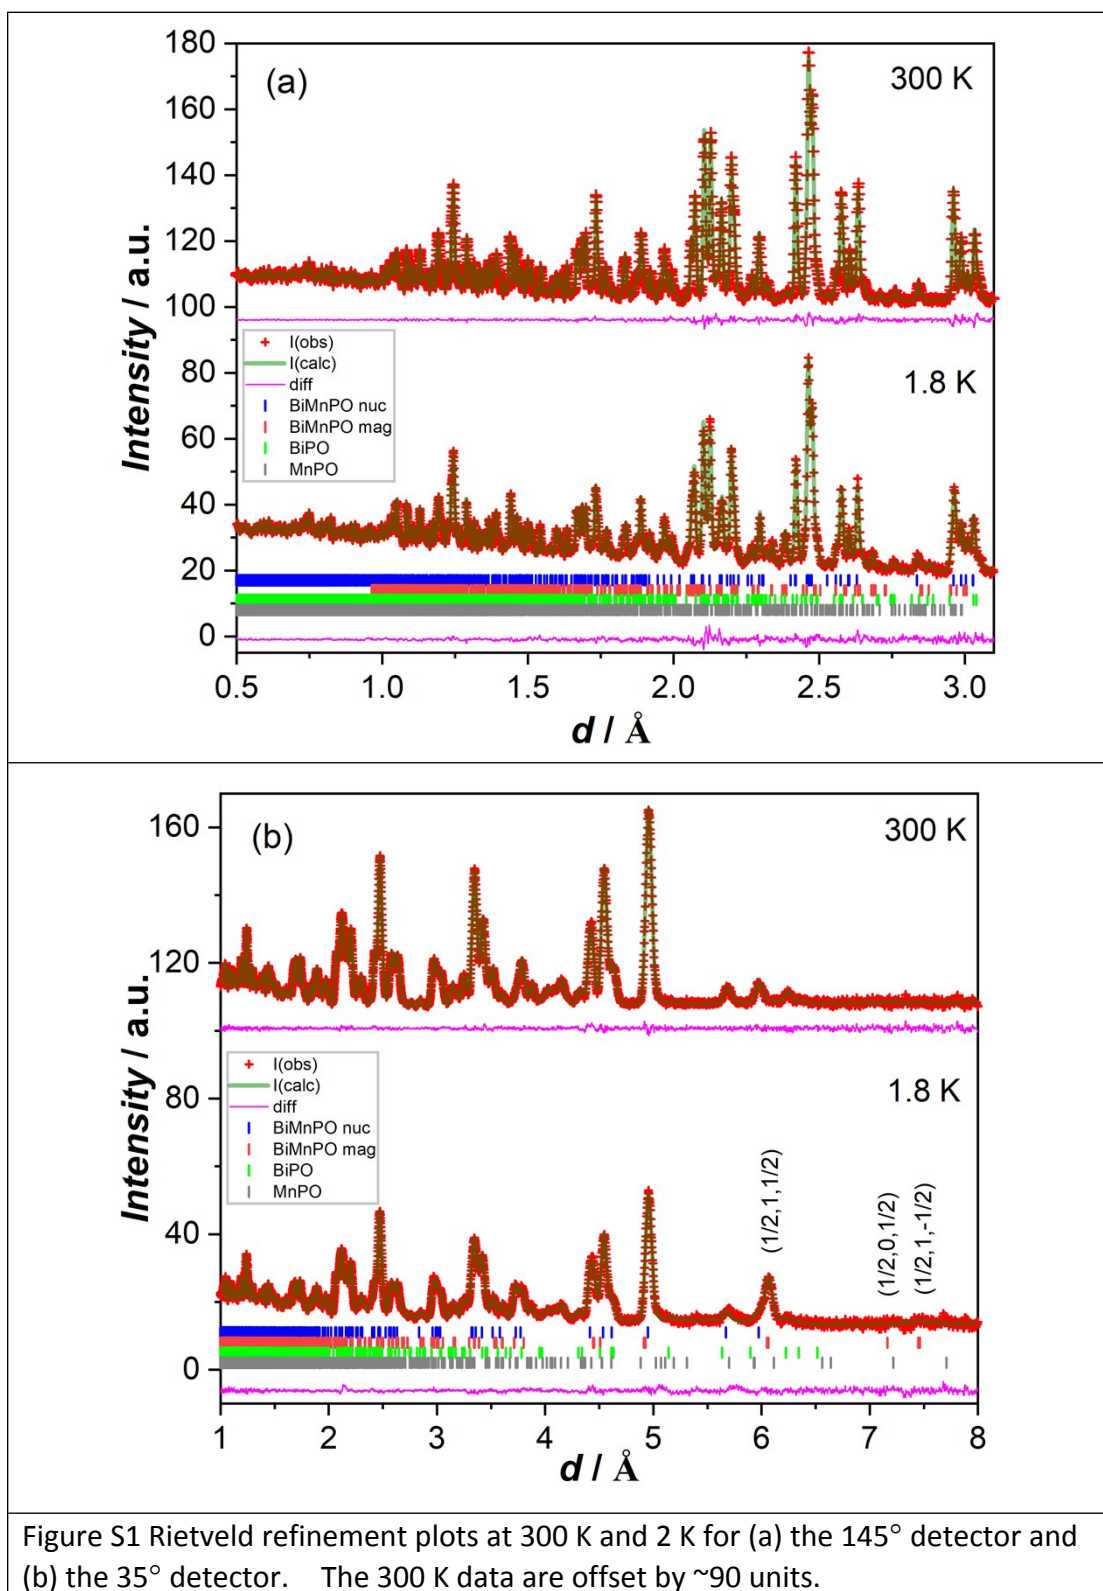

Figure S1 Rietveld refinement plots at 300 K and 2 K for (a) the 145° detector and (b) the 35° detector. The 300 K data are offset by ~90 units.

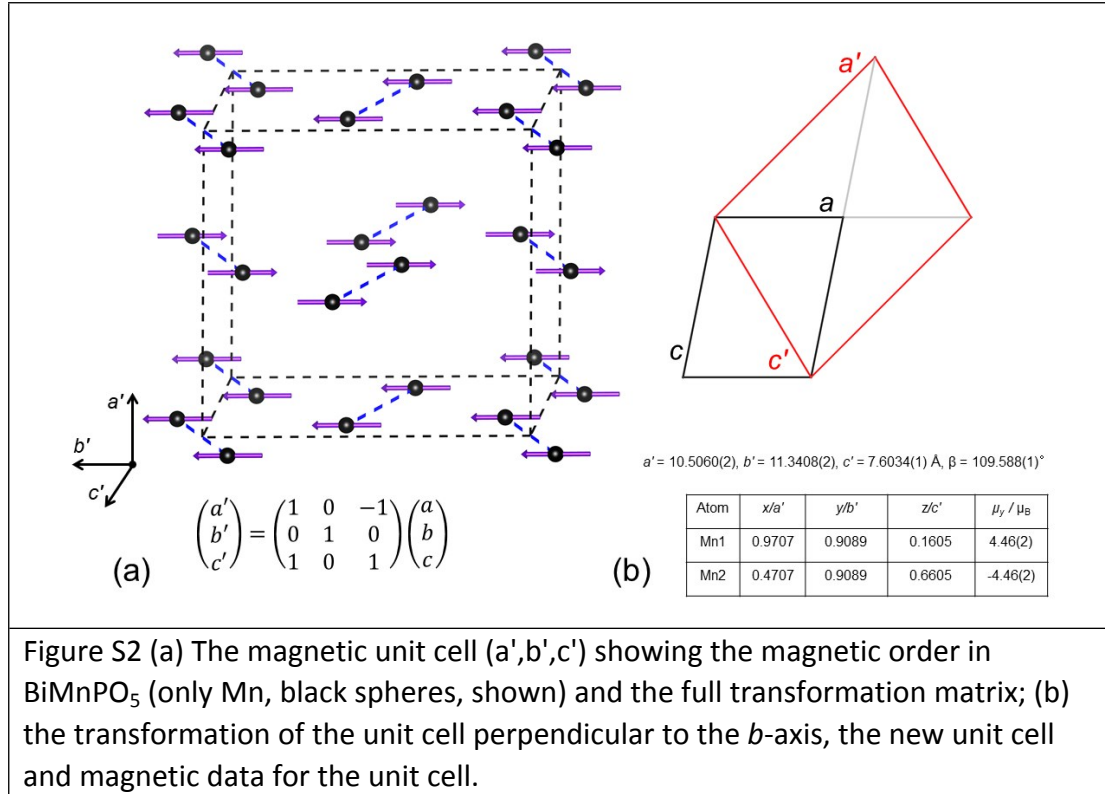

## 90° Direct and 180° Superexchange

GKA mechanism, Very Strong AFM

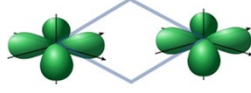

I:  $d_{xy} - d_{xy}$

$$J_{dd} \sim -\frac{t_{dd}^2}{U_{dd}}$$

-24.20 meV

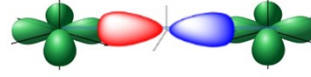

II:  $d_{x^2-y^2} - P_x - d_{x^2-y^2}$

$$J_S^\sigma \sim -\frac{t_{pd\sigma}^4}{\Delta^2} \left( \frac{1}{U_{dd}} + \frac{1}{2\Delta + U_{pp}} \right)$$

-25.31 meV

## Strict Orthogonality

O. Kahn mechanism, Strong FM

GKA mechanism, moderate AFM

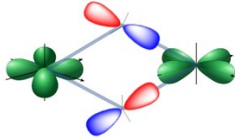

III:  $d_{xy} - P_y - d_{x^2-y^2} - P_x - d_{xy}$

$$J_K^{\sigma\pi} \sim \frac{t_{pd\sigma}^2 t_{pd\pi}^2}{\Delta^2} \left( \frac{1}{U_{dd}} + \frac{1}{2\Delta + U_{pp}} \right)$$

7.20 meV

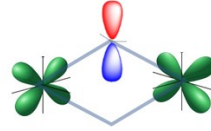

IV:  $d_{yz} - P_z - d_{xz}$

$$J_S^\pi \sim -\frac{t_{pd\pi}^4}{\Delta^2} \left( \frac{1}{U_{dd}} + \frac{1}{2\Delta + U_{pp}} \right)$$

-2.05 meV

## Accidental Orthogonality

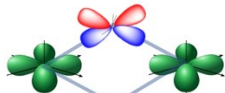

$d_{xy} - P_x \perp P_y - d_{xy}$

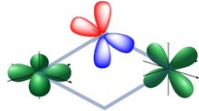

$d_{xy} - P_x \perp P_z - d_{xz}$

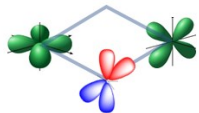

V:  $d_{xy} - P_y \perp P_z - d_{yz}$

$$J_{AO}^\pi \sim \frac{t_{pd\pi}^4 J_H^P}{\Delta^2 (2\Delta + U_{pp})^2}$$

0.11 meV

GKA mechanism, moderate AFM

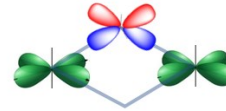

VI:  $d_{x^2-y^2} - P_x \perp P_y - d_{x^2-y^2}$

$$J_{AO}^\sigma \sim \frac{t_{pd\sigma}^4 J_H^P}{\Delta^2 (2\Delta + U_{pp})^2}$$

1.37 meV

Figure S3 Magnetic exchange pathways in Di-manganese (II, II) pairs with edge-shared Mn-(μ-O)<sub>2</sub>-Mn bonds. Green, Mn3d-orbitals; red/blue O2p showing phase.

### 3. References

1. X. Xun, S. Uma and A.W. Sleight, *J. Alloys and Compounds* 2002, **338**, 51-53.
2. R. I. Smith, S. Hull and A. R. Armstrong, "The Polaris Powder Diffractometer at ISIS.", in Proceedings of the 3rd European Powder Diffraction Conference, Vienna, Austria, 1993, (Ed. R. Delhez and E.J. Mittemeijer), *Mater. Sci. Forum* 1994, **166-169**, 251-256.
3. A. C. Larson and R. B. Von Dreele, "General Structure Analysis System (GSAS)," 2000.
4. B. H. Toby, EXPGUI, a graphical user interface for GSAS, *J. Appl. Crystallogr.* 2001, **34**, 210–213.
5. R. Dovesi, F. Pascale, B. Civalleri, K. Doll, N. M. Harrison, I. Bush, P. D'Arco, Y. Noel, M. Rerat, P. Carbonniere, M. Causa, S. Salustro, V. Lacivita, B. Kirtman, A. M. Ferrari, F. S. Gentile, J. Baima, M. Ferrero, R. Demichelis and M. D. La Pierre, *J. Chem. Phys.* 2020, **152**, 204111.
6. M. F. Peintinger, D. Vilela Oliveira and T. Bredow, *J. Comput. Chem.* 2013, **34**, 451-459.
7. A. D. Becke, *J. Chem. Phys.* 1993, **98**, 5648-5652.
8. P. J. Stephens, F. J. Devlin, C. F. Chabalowski and M. J. Frisch, *J. Phys. Chem.* 1994, **98**, 11623–11627.
9. K. Yamaguchi, H. Fukui and T. Fueno, *Chem. Lett.* 1986, **15**, 625–628.
